# Supplementary material for: Investigation of the Mo2Ti2C3Tx MXene in the electrochemical immunosensing of the respiratory syncytial virus (RSV)
Source: Royal Society of Chemistry journal article supplement (doi:10.1039/d4nr04333b), 2025-01-01
Supplement: d4nr04333b1.pdf [file d4nr04333b1.pdf]

## Investigation of $\text{Mo}_2\text{Ti}_2\text{C}_3\text{T}_x$ MXene in electrochemical immunosensor for respiratory syncytial virus (RSV) detection

Supporting information:

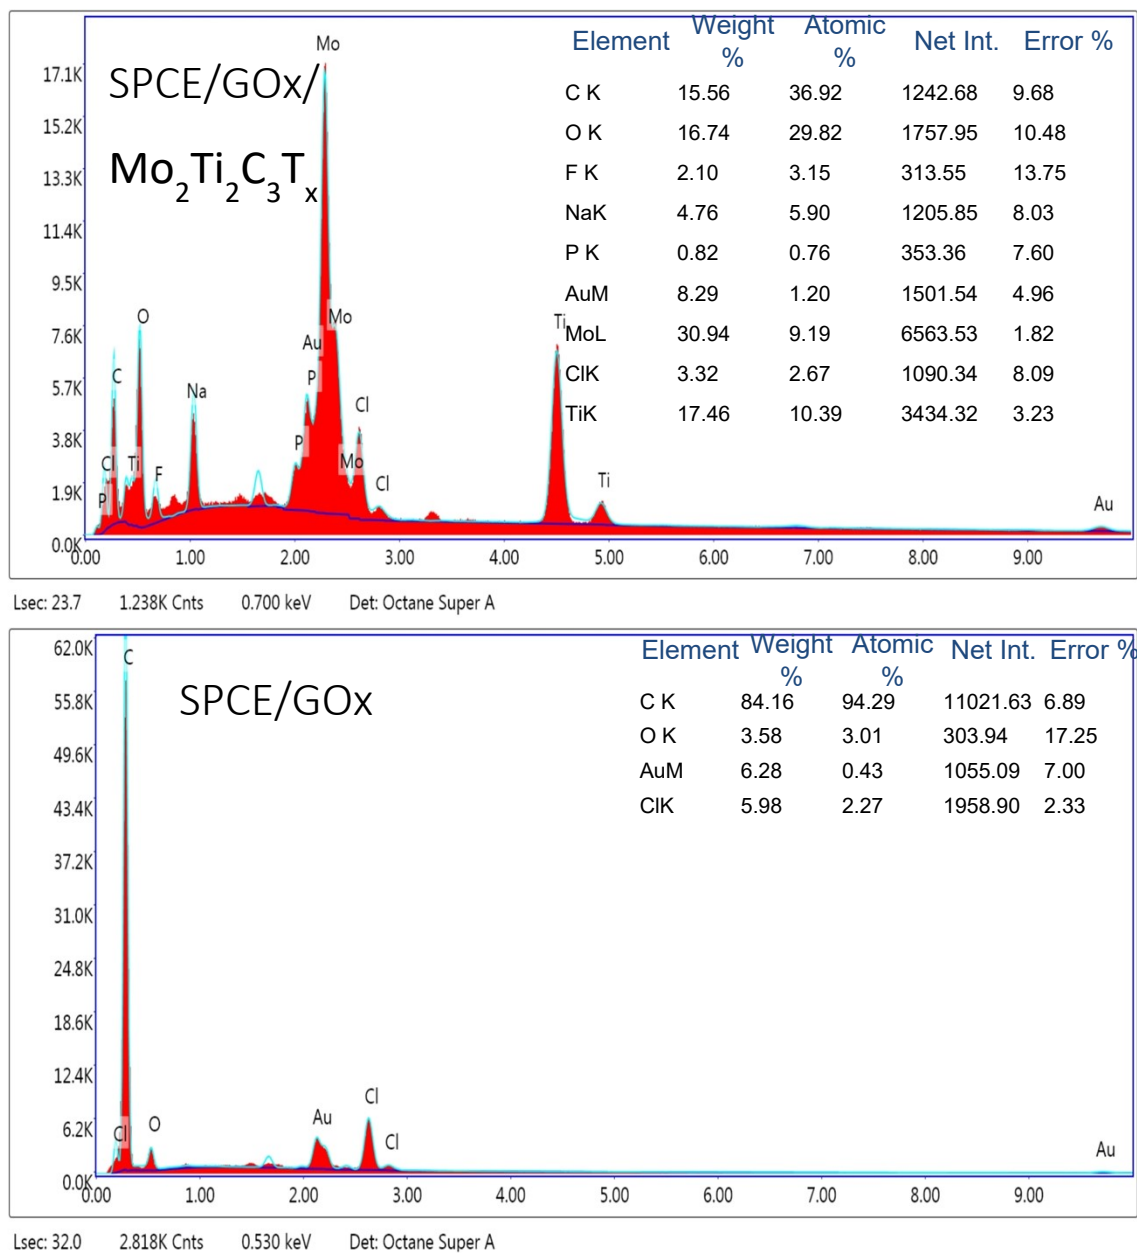

Figure S.1: Elemental mapping images of the SPCE/GOx before and after addition of  $\text{Mo}_2\text{Ti}_2\text{C}_3\text{T}_x$ .

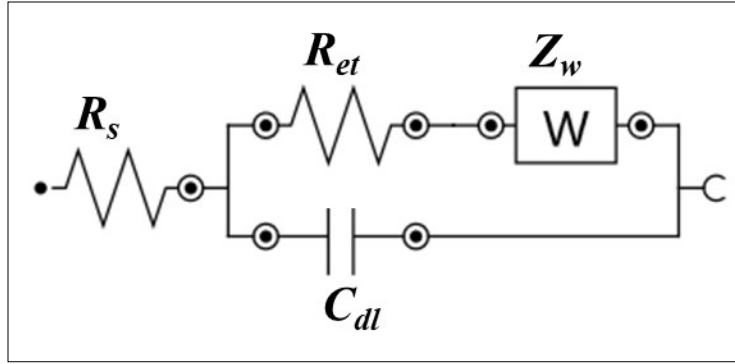

Figure S.2: Randles and Ershler equivalent circuit used for impedance spectra fitting.

Table S.1: Comparison of some biosensors reported for RSV and other respiratory viruses determination.

| Target                                        | Technique                                                              | Detection method                       | Linear range                                         | LOD                                   | Ref |
|-----------------------------------------------|------------------------------------------------------------------------|----------------------------------------|------------------------------------------------------|---------------------------------------|-----|
| RSV                                           | 4-aminothiophenol/gluteraldehyde/ glassy carbon electrode/immunosensor | Electrochemical impedance spectroscopy | $1.0 \times 10^5$ PFU/mL to $1.5 \times 10^7$ PFU/mL | $2.85 \times 10^6$ PFU/mL             | [1] |
| RSV                                           | Poly-L-lysine/gold electrode/immunosensor                              | Electrochemical impedance spectroscopy | $1.0 \times 10^5$ PFU/mL to $1.0 \times 10^7$ PFU/mL | $1.1 \times 10^3$ PFU/mL              | [1] |
| RSV                                           | Gene biosensor                                                         | Surface plasmon resonance              | 1 nM-1 $\mu$ M                                       | 3 nM                                  | [2] |
| RSV                                           | Gold nanoparticles based immunoassay                                   | Colorimetric                           | 0.5-20 pg/mL                                         | 0.01 pg/mL                            | [3] |
| SARS-CoV-2<br>Nucleocapsid and Spike proteins | Plasmonic nanostructure-immunosensor                                   | SERS                                   | 0.1 pg/ mL-1 mg/mL and 1 fg/mL-1 mg/mL               | 0.1 pg/ mL and 1 fg/mL                | [4] |
| SARS-CoV-2                                    | Molecularly-imprinted polymer nanoparticles                            | SPR                                    | $(0.25-1.75) \times 10^6$ particles/mL               | $(0.1-3.61) \times 10^5$ particles/mL | [5] |
| SARS-CoV-2                                    | double- $\pi$ structure aptasensor                                     | SERS                                   | 1 fg/mL to 1 ng/mL                                   | 0.16 and 0.1 fg/mL                    | [6] |

|     |                                                                                                   |                            |                           |                |                  |
|-----|---------------------------------------------------------------------------------------------------|----------------------------|---------------------------|----------------|------------------|
| 2   |                                                                                                   |                            |                           |                |                  |
| RSV | GOx/ Mo <sub>2</sub> Ti <sub>2</sub> C <sub>3</sub> T <sub>x</sub> MXene /<br>/SPCEs immunosensor | Square wave<br>voltammetry | 0.01<br>pg/mL-10<br>μg/mL | 0.015<br>pg/mL | This<br>wor<br>k |

SERS: surface-enhanced Raman scattering

SPR: Surface plasmon resonance

1. Białobrzaska, W., et al., *Electrochemical immunosensors based on screen-printed gold and glassy carbon electrodes: comparison of performance for respiratory syncytial virus detection*. Biosensors, 2020. **10**(11): p. 175.
2. Shi, L., et al., *Development of SPR biosensor for simultaneous detection of multiplex respiratory viruses*. Bio-medical materials and engineering, 2015. **26**(s1): p. S2207-S2216.
3. Zhan, L., et al., *Sensitive immunosensor for respiratory syncytial virus based on dual signal amplification of gold nanoparticle layer-modified plates and catalyzed reporter deposition*. Sensors and Actuators B: Chemical, 2018. **255**: p. 1291-1297.
4. Yeh, Y.-J., et al., *Plasmonic nanostructure-enhanced Raman scattering for detection of SARS-CoV-2 nucleocapsid protein and spike protein variants*. Analytica chimica acta, 2023. **1239**: p. 340651.
5. Bajaj, A., et al., *Synthesis of molecularly imprinted polymer nanoparticles for SARS-CoV-2 virus detection using surface plasmon resonance*. Chemosensors, 2022. **10**(11): p. 459.
6. Dong, Y., et al., *Simultaneous and sensitive detection of SARS-CoV-2 proteins spike and nucleocapsid based on long-range SERS biosensor*. Analytica Chimica Acta, 2024. **1287**: p. 342070.
